# Supplementary material
Source: MDPI journal article supplement (https://www.mdpi.com/2071-1050/13/11/5816)
Supplement: s1 [file s1 › sustainability-1209269-supplementary.pdf]

BEFORE THE WILDFIRE

AFTER THE WILDFIRE

2003

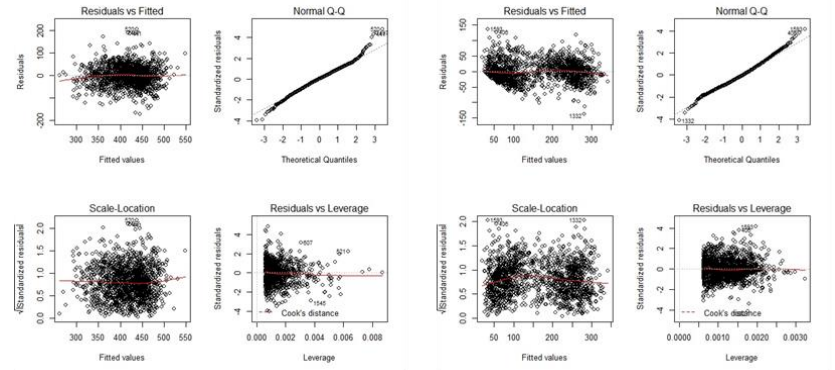

2017

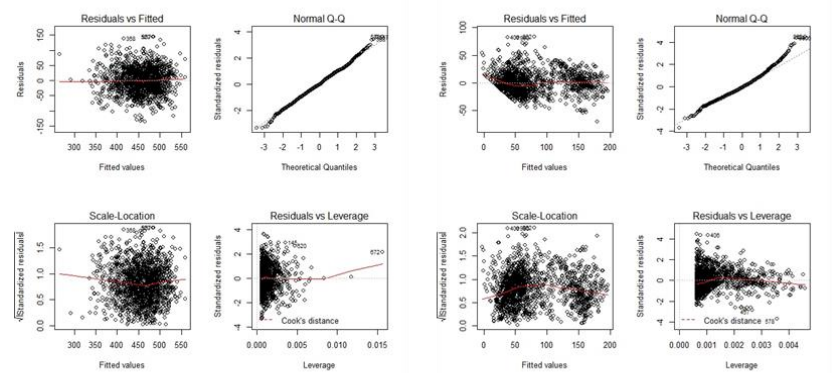

2019

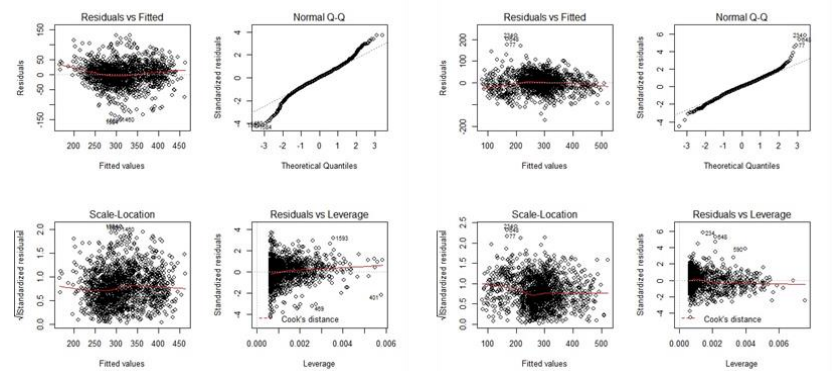

**Figure S1.** Analysis of residuals according to (a) homogeneity of variance, (b) normality, (c) independence, and (d) Cook's distance, for the linear models before and after the wildfires of 2003, 2017 and 2019.
